# Supplementary material for: Excellent Pd-Loaded Magnetic Nanocatalyst on Multicarboxyl and Boronic Acid Biligands
Source: PubMed Central journal article supplement — ACS Omega. 2024 Apr 10;9(16):17817–31. doi: 10.1021/acsomega.3c07133 (PMC11044249; doi:10.1021/acsomega.3c07133), 2024-04-10
Supplement: ao3c07133_si_001.pdf [file ao3c07133_si_001.pdf]

# An excellent Pd-loaded magnetic nanocatalyst on multi-carboxyl and boronic acid bi-ligands

Supporting materials

Haijiao Jia, Mengqi Cheng, Ran Zhao, Pingyi Zheng, Fangfang Ren, Yaqin Nan,

Mengting Huang, and Youxin Li\*

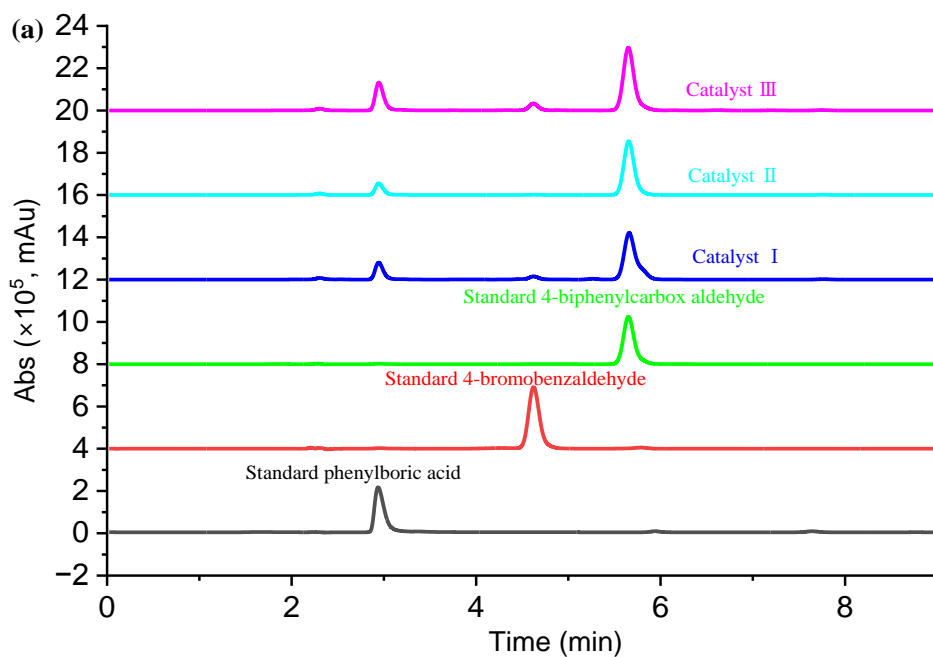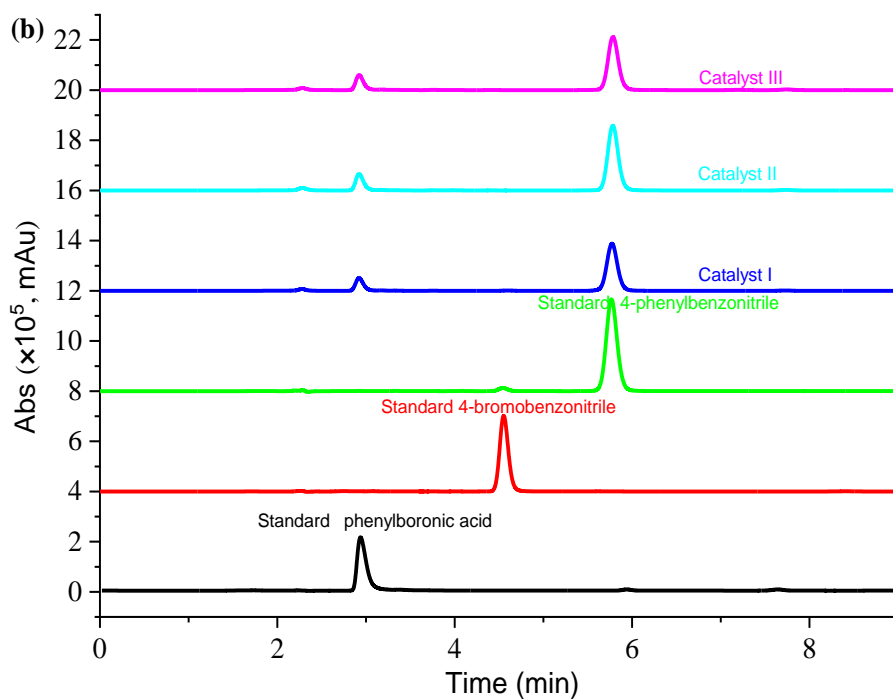

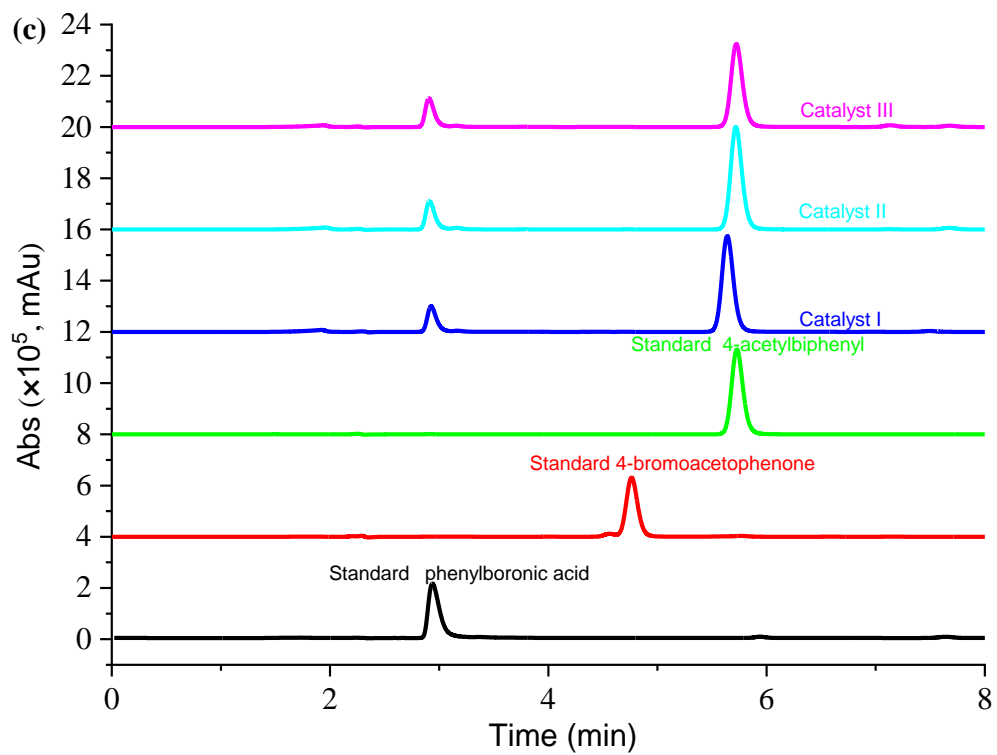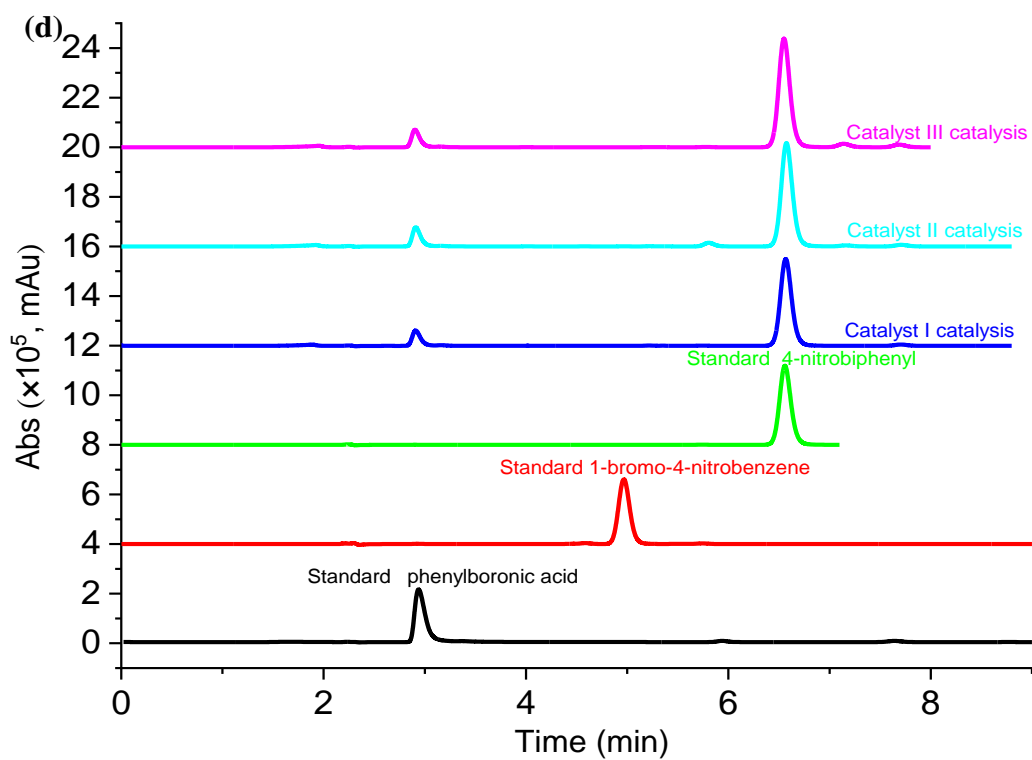

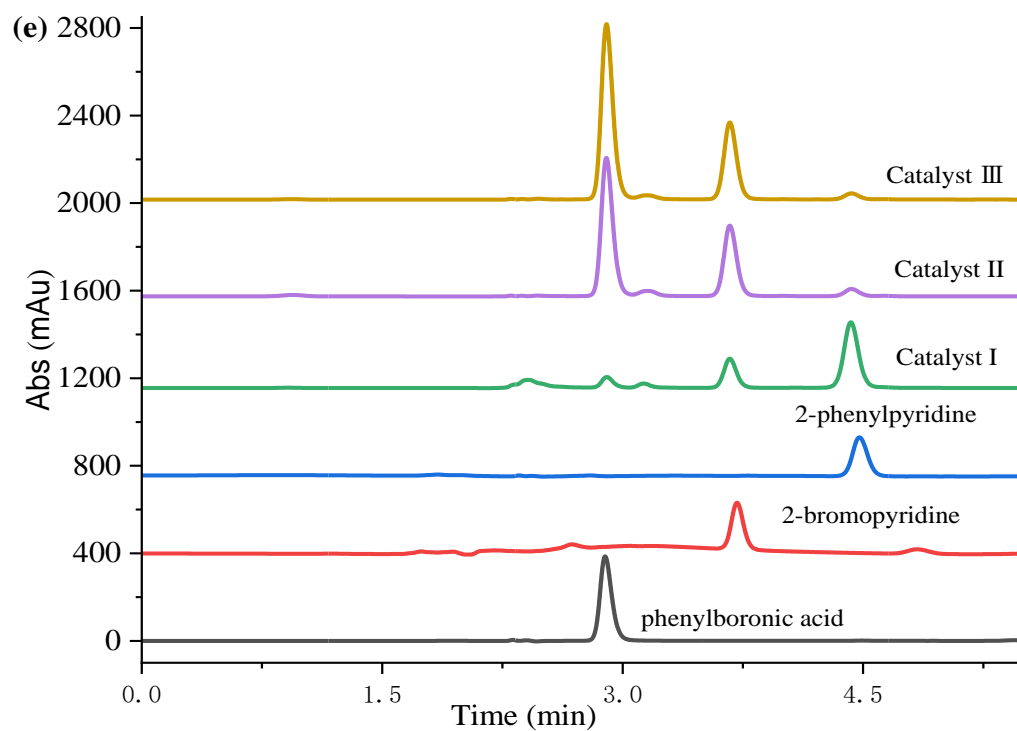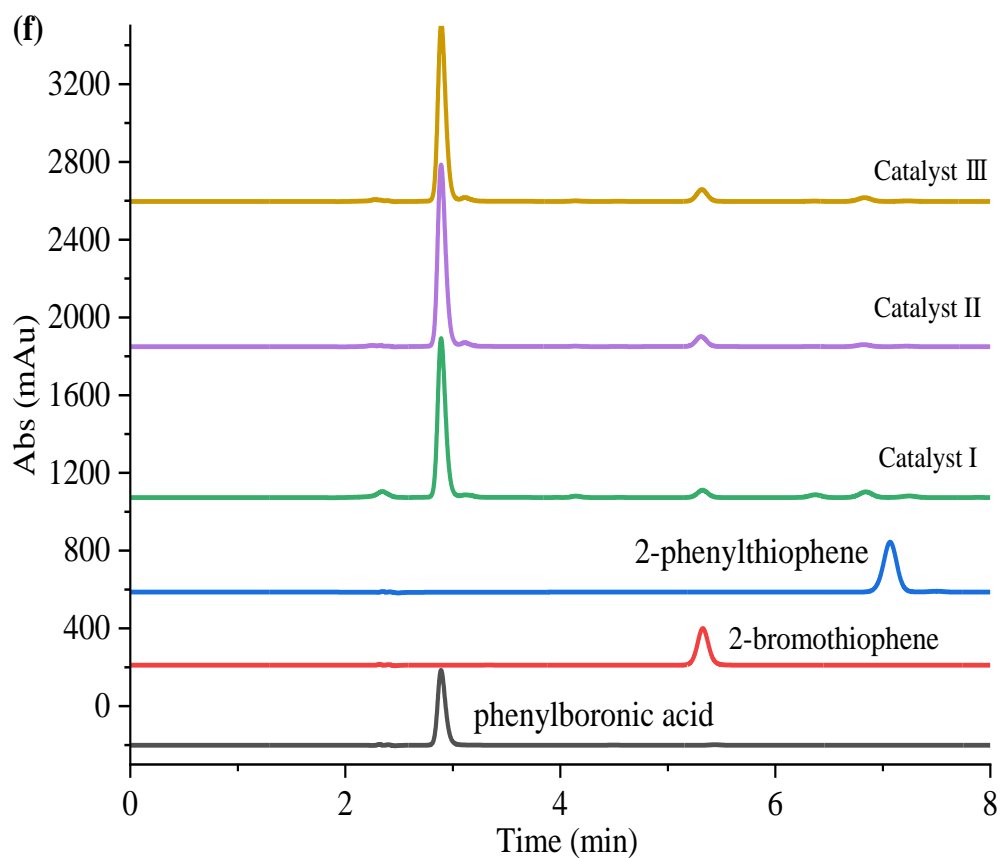

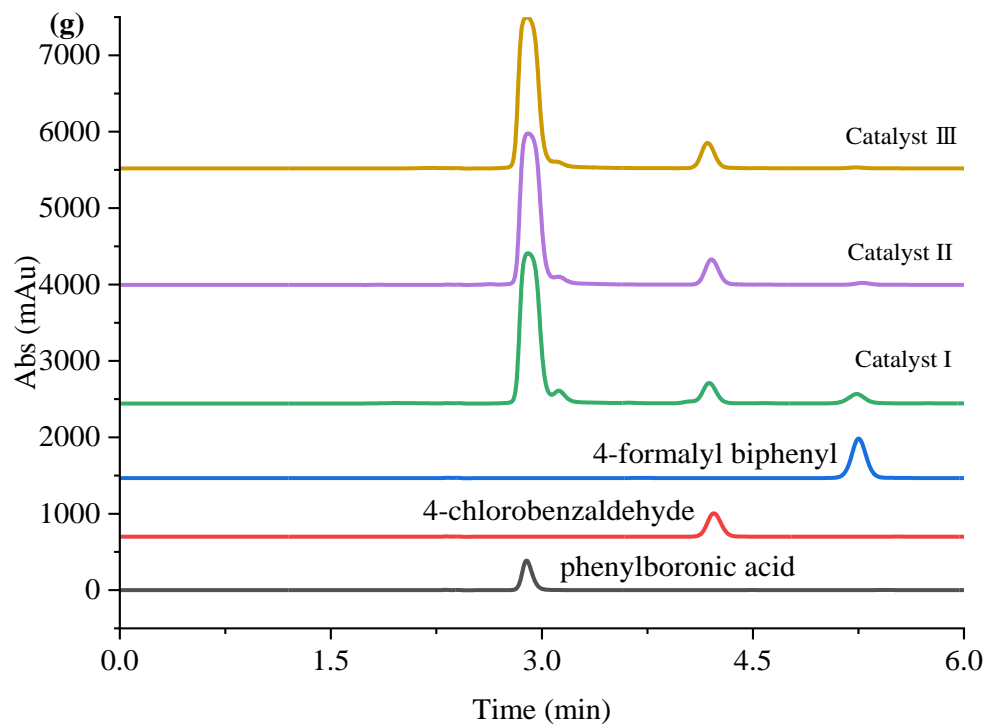

Figure S1 HPLC chromatograms of Suzuki reaction products between phenylboronic acid and 4-bromobenzaldehyde (a), 4-bromobenzonitrile (b), 4-bromoacetophenone (c) and 1-bromo-4-nitrobenzene (d), 2-bromopyridine (e), 2-bromothiophene (f) and 4-chlorobenzaldehyde (g) catalyzed by Catalyst I, II and III

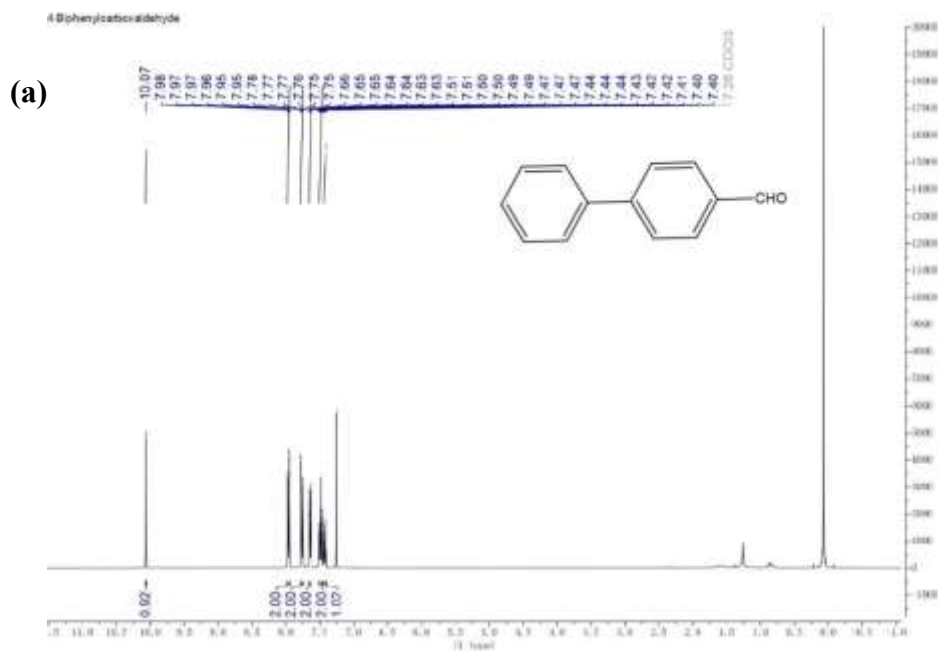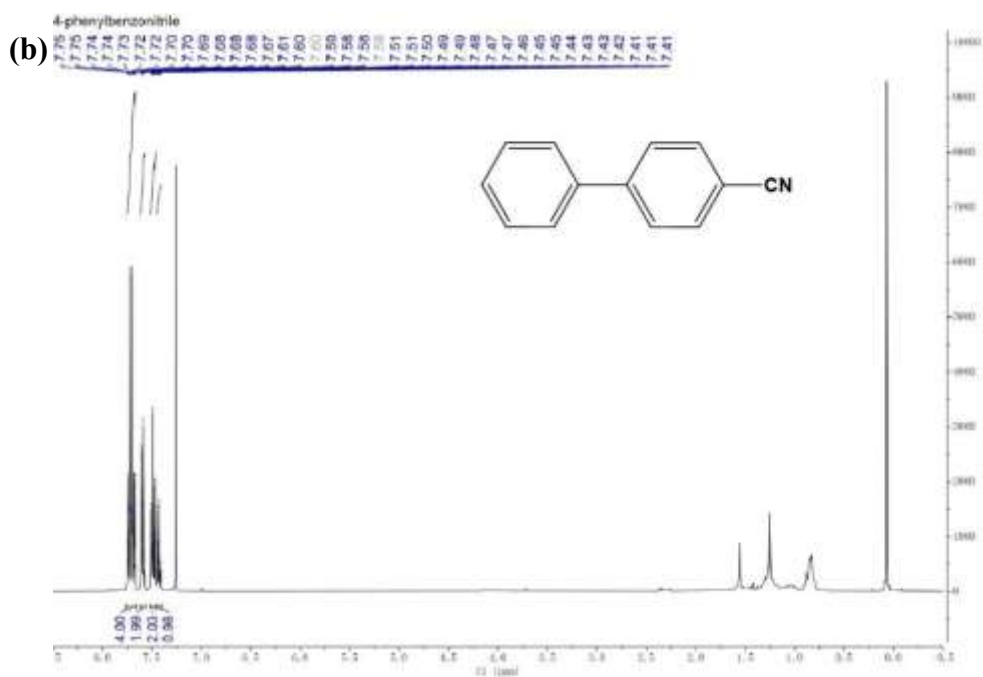

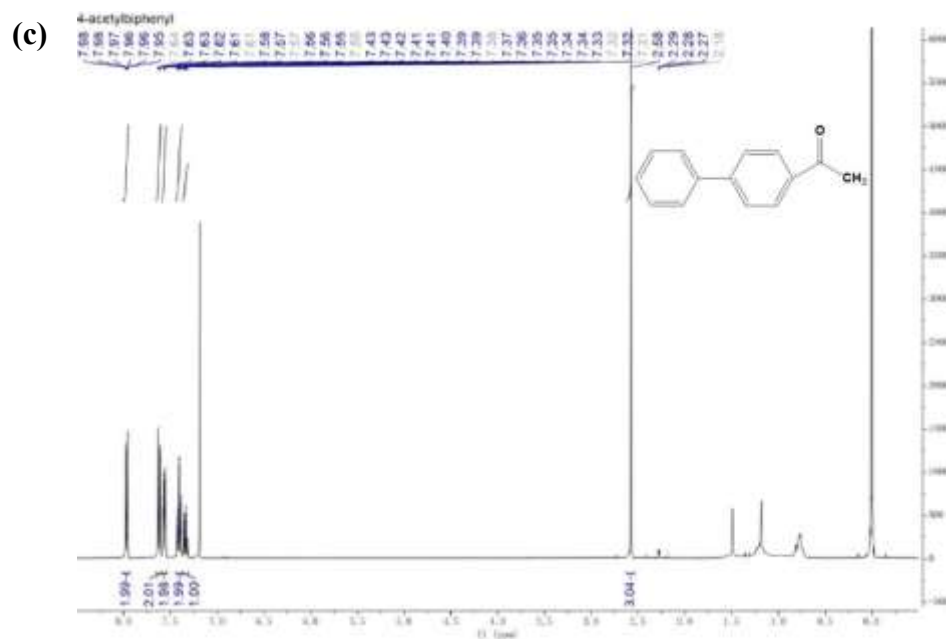

$^1\text{H NMR}$  (400 MHz, Chloroform- $d$ ) :  $\delta$  7.63-7.58 (m, 2H), 7.48-7.41 (m, 2H), 7.39-7.33 (m, 2H), 7.19 (ddd,  $J = 7.6, 1.7, 1.0$  Hz, 1H), 7.14 (dd,  $J = 2.6, 1.6$  Hz, 1H), 6.91 (ddd,  $J = 8.2, 2.6, 1.0$  Hz, 1H), 3.88 (s, 3H)

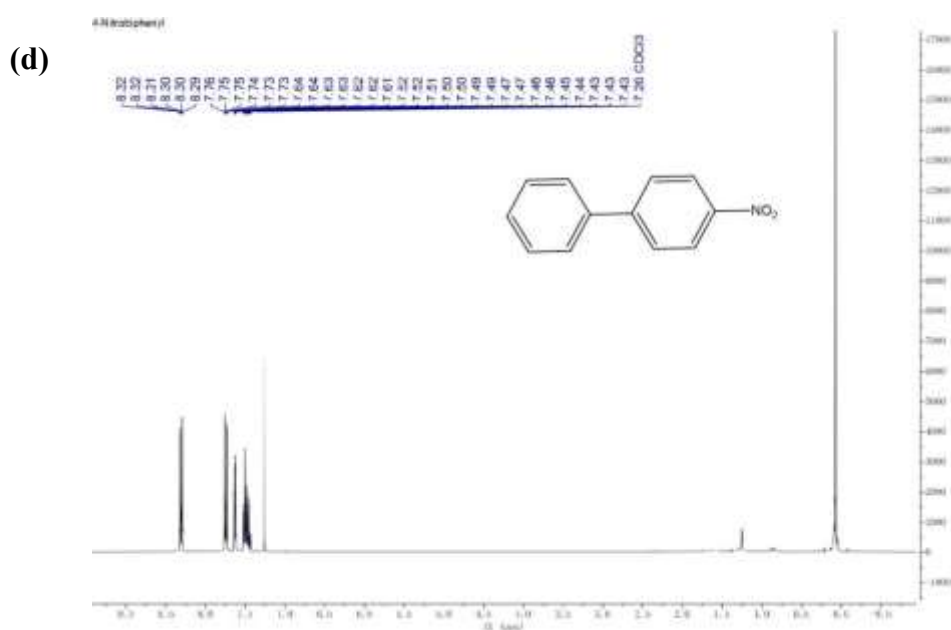

$^1\text{H NMR}$  (400 MHz, Chloroform- $d$ ) :  $\delta$  8.33-8.27 (m, 2H), 7.76-7.72 (m, 2H), 7.65-7.61 (m, 2H), 7.53-7.48 (m, 2H), 7.47-7.43 (m, 1H)

Figure S2  $^1\text{H NMR}$  spectra of Suzuki product of 4-biphenylcarboxaldehyde (a), 4-phenylbenzotrile (b), 4-acetylbiphenyl (c) and 4-nitrobiphenyl (d)

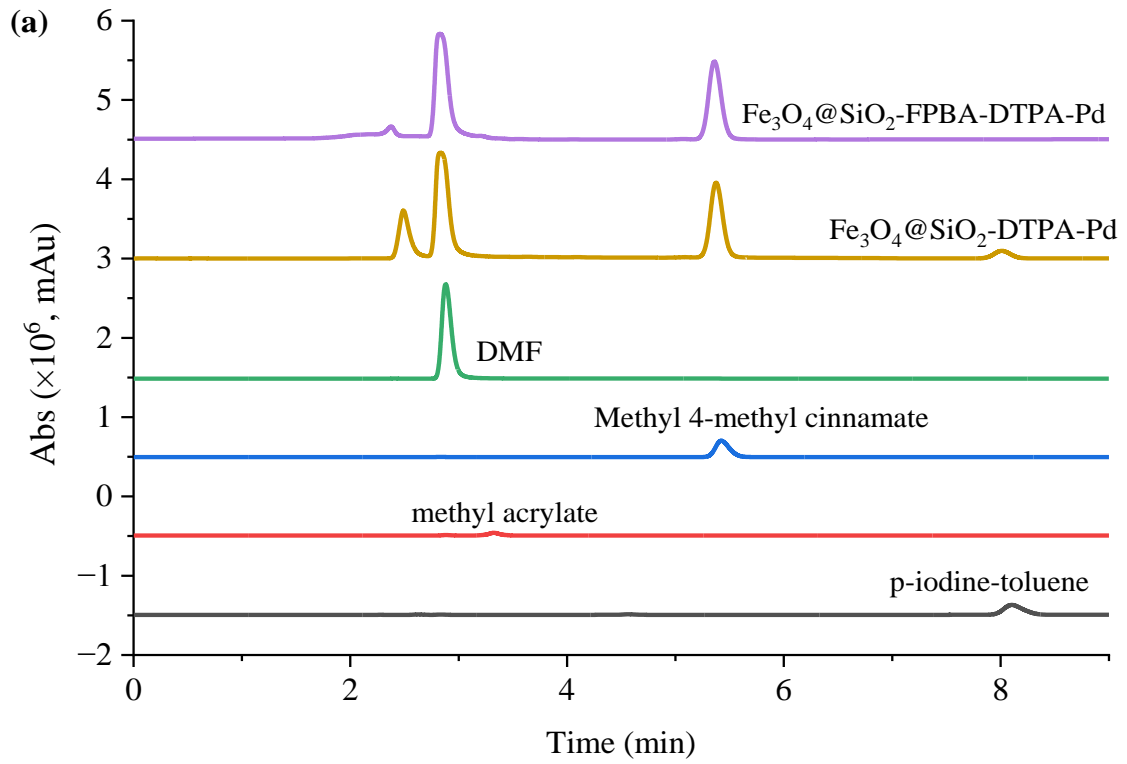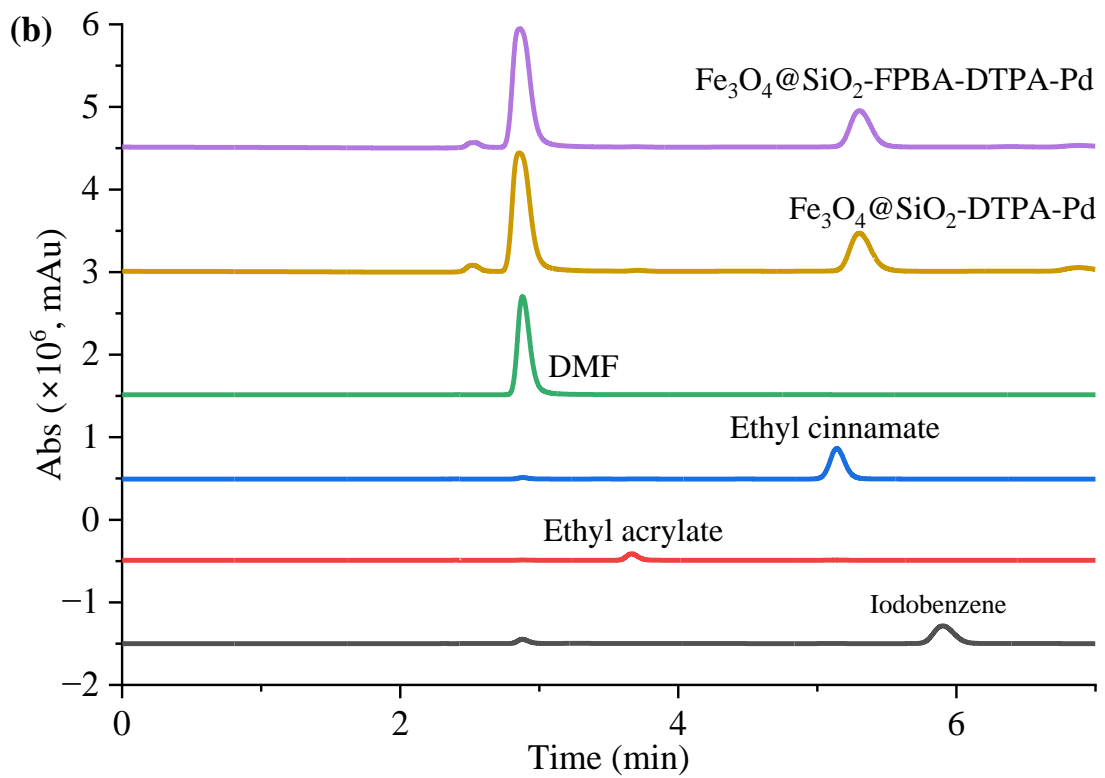

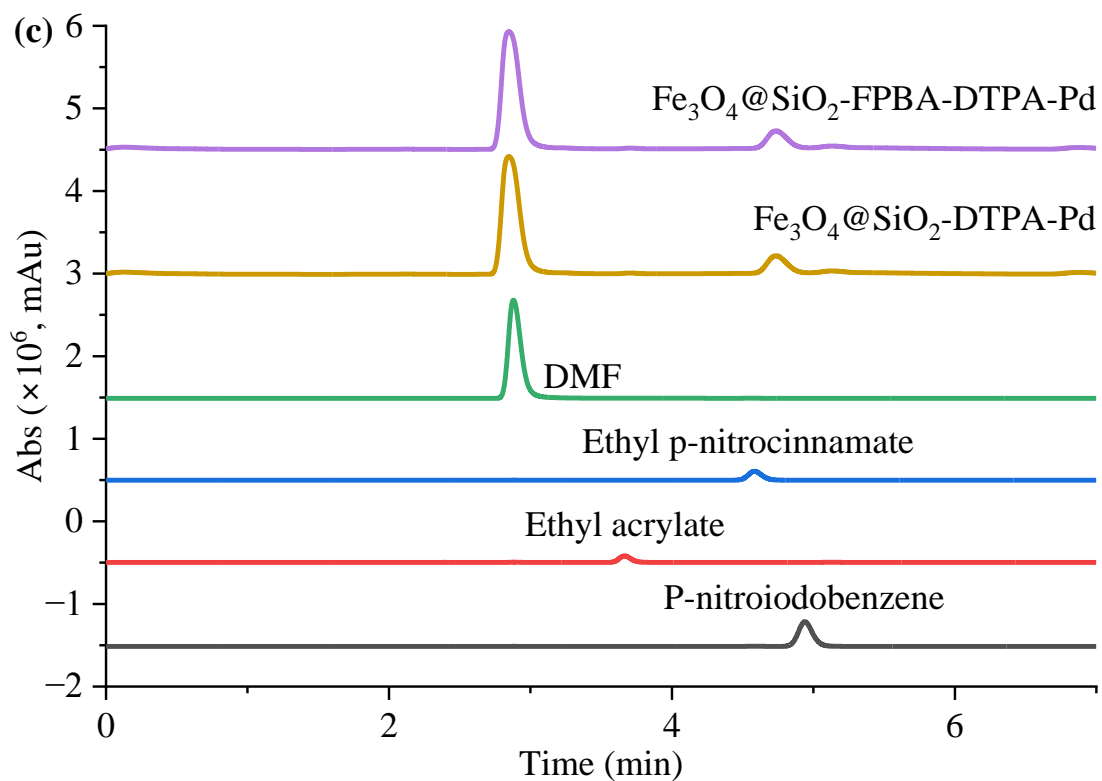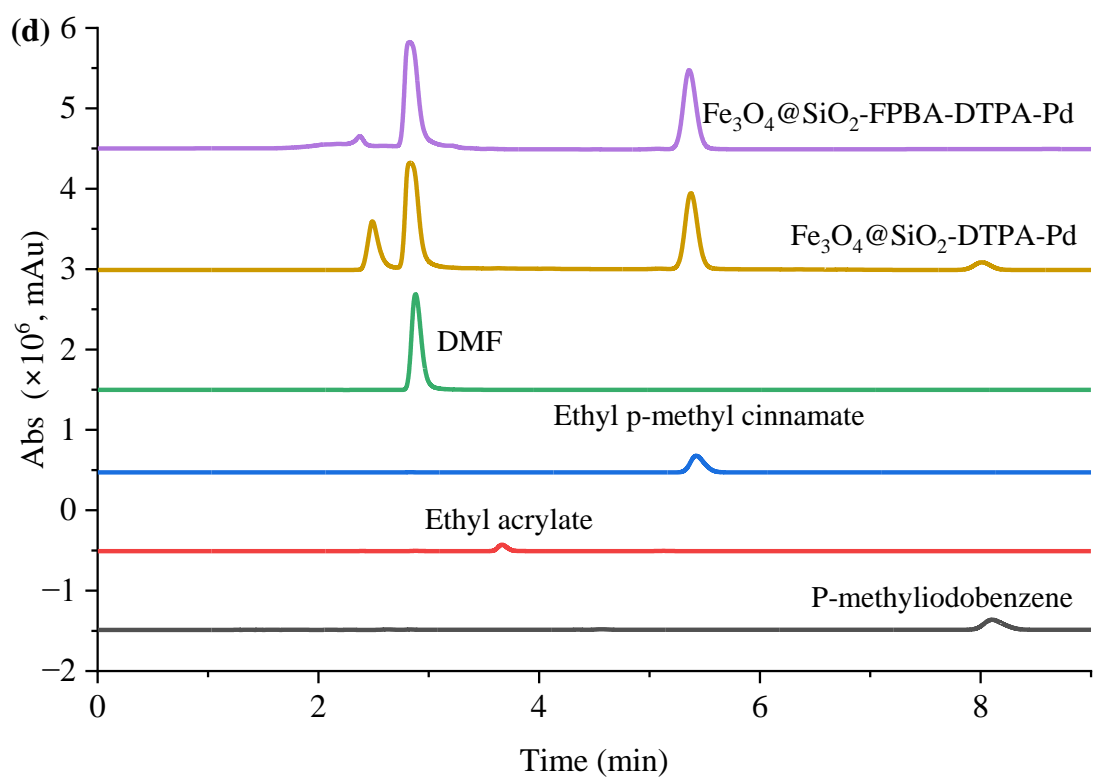



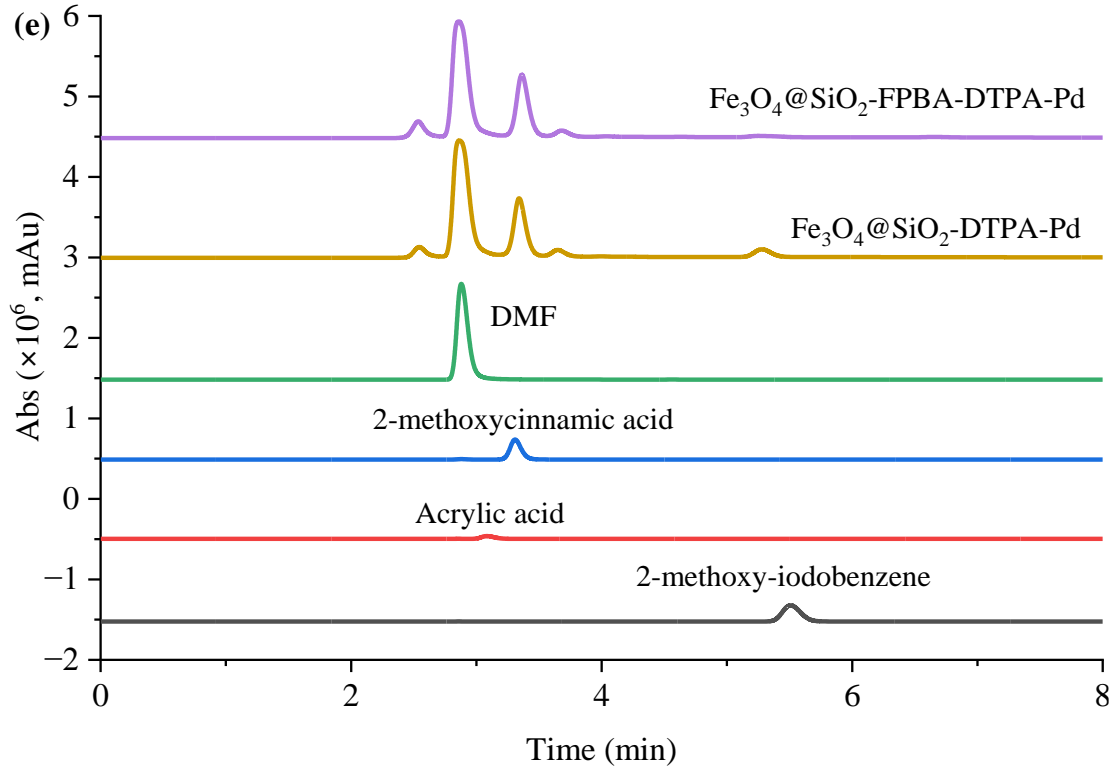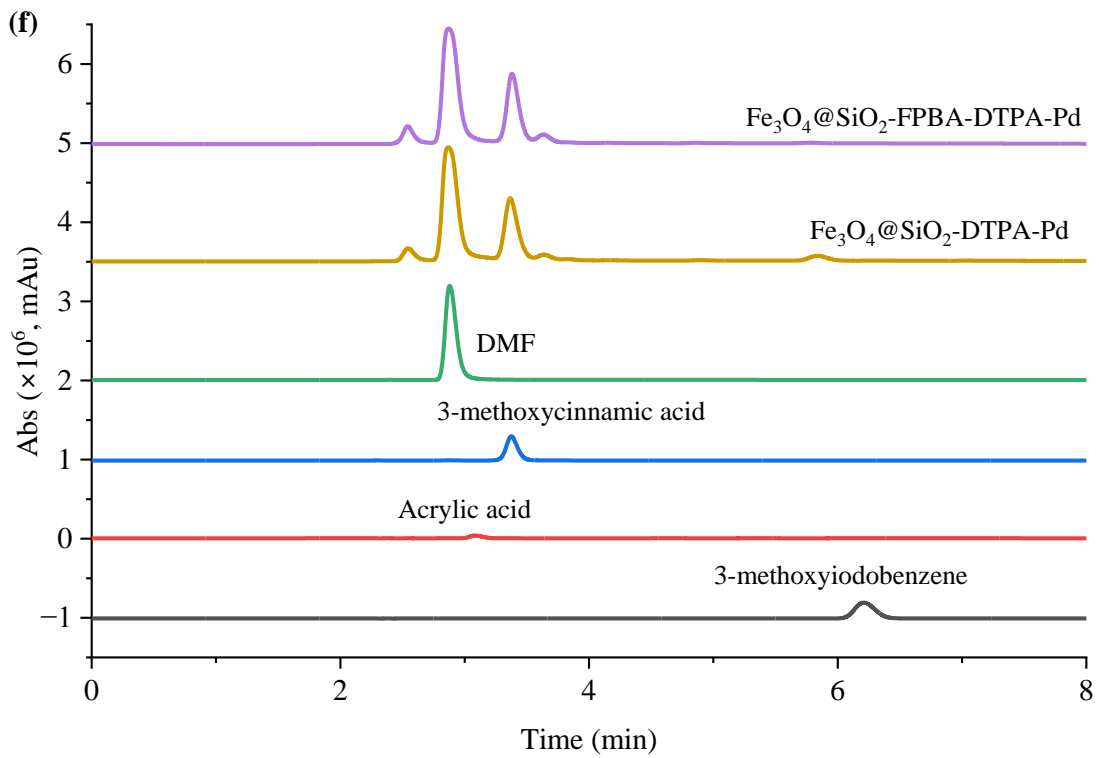

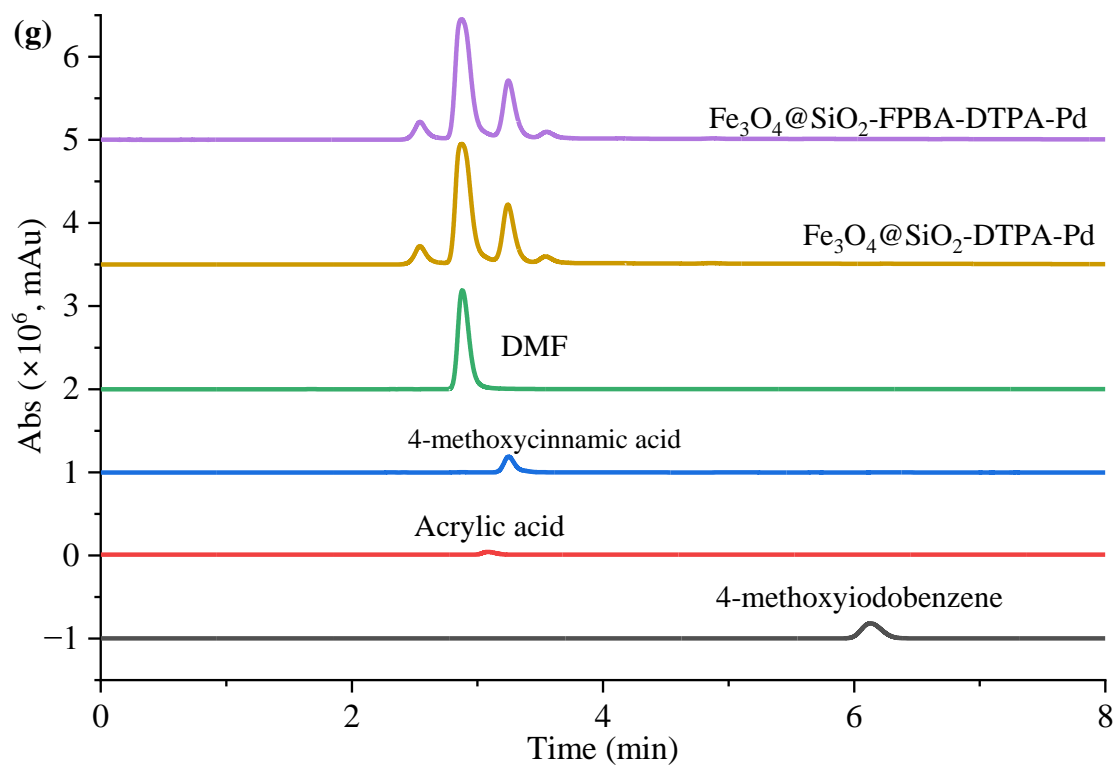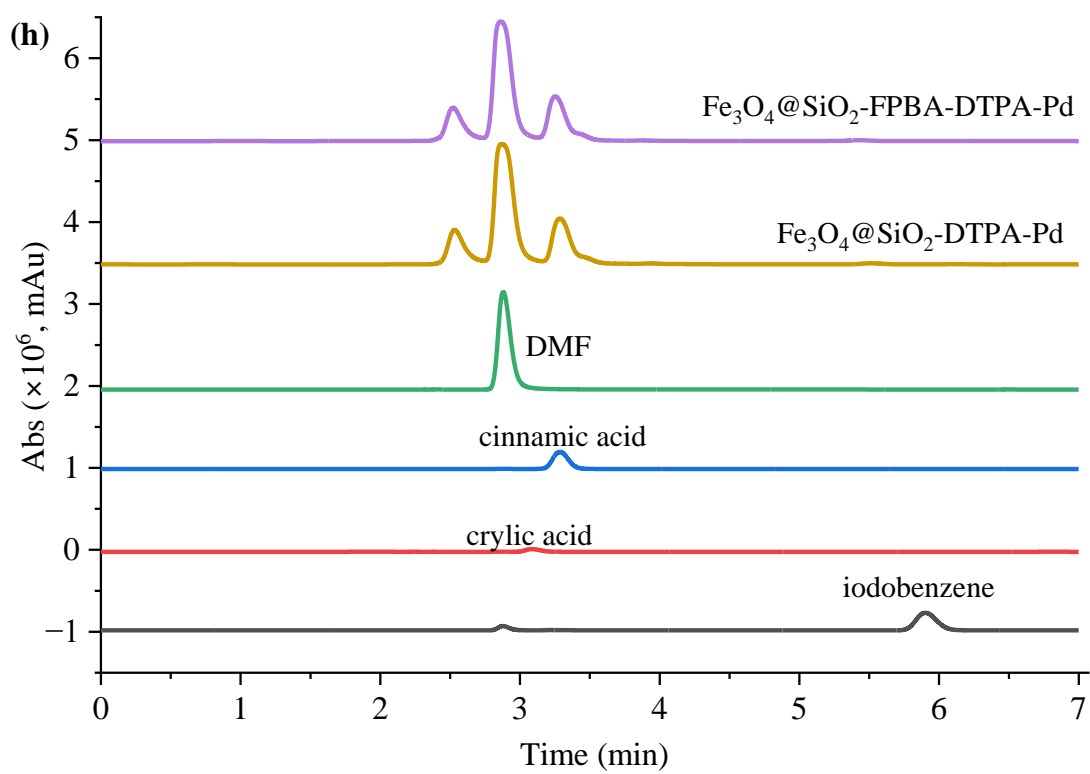

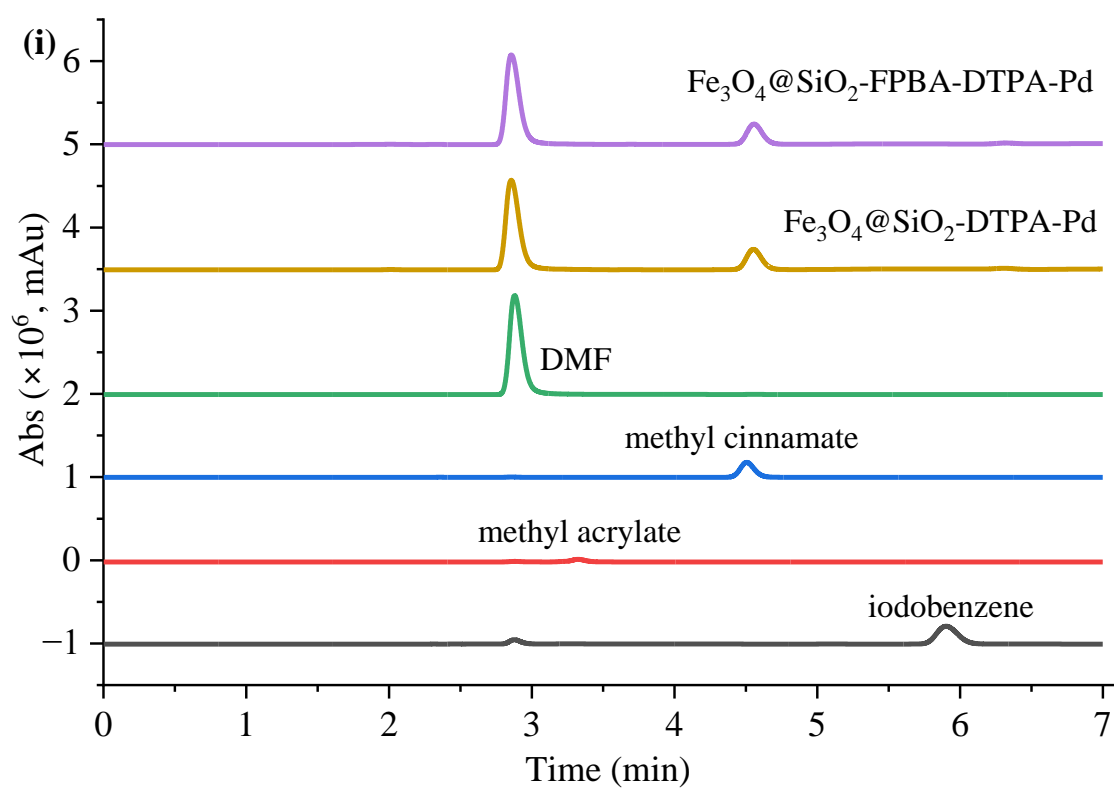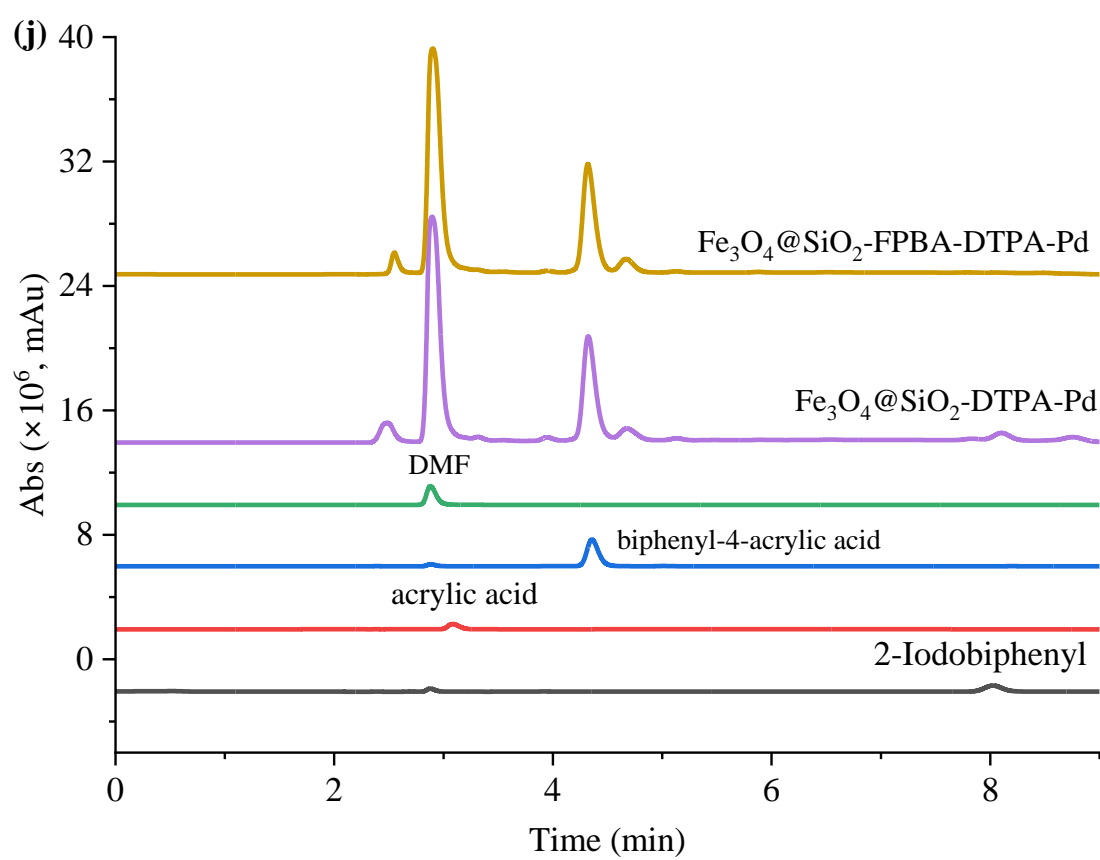

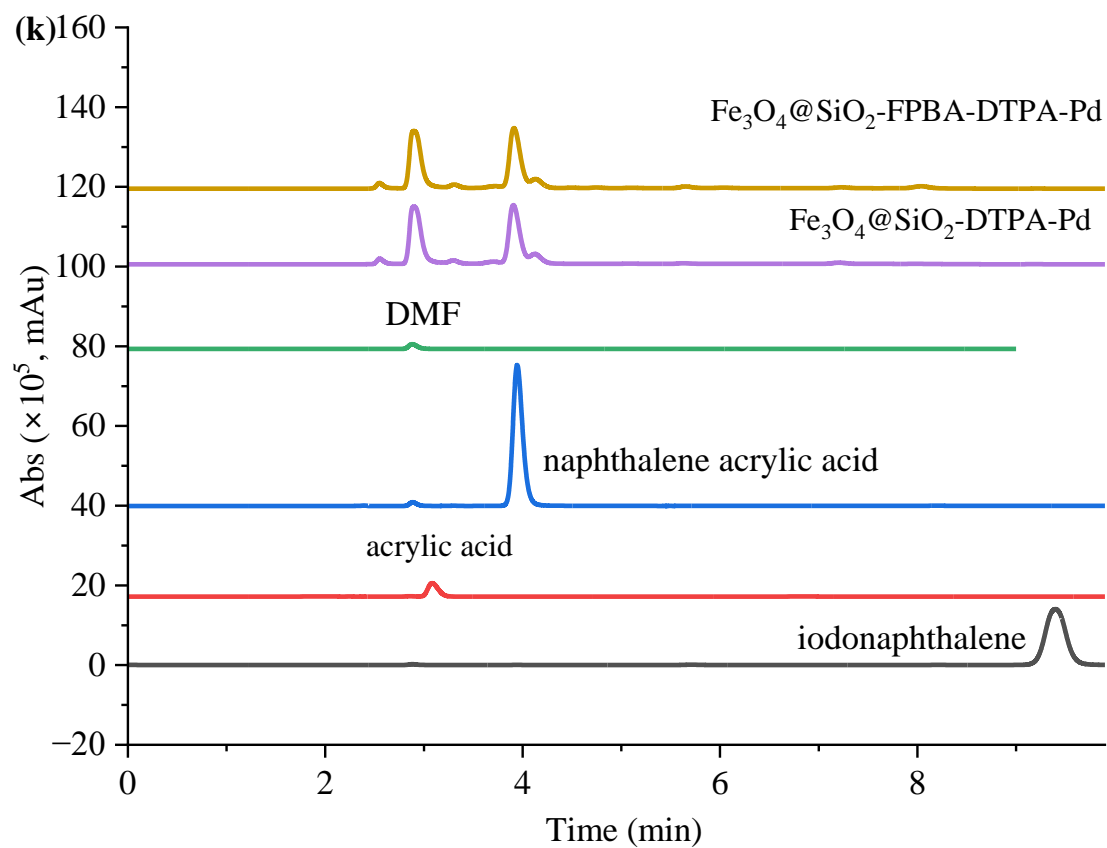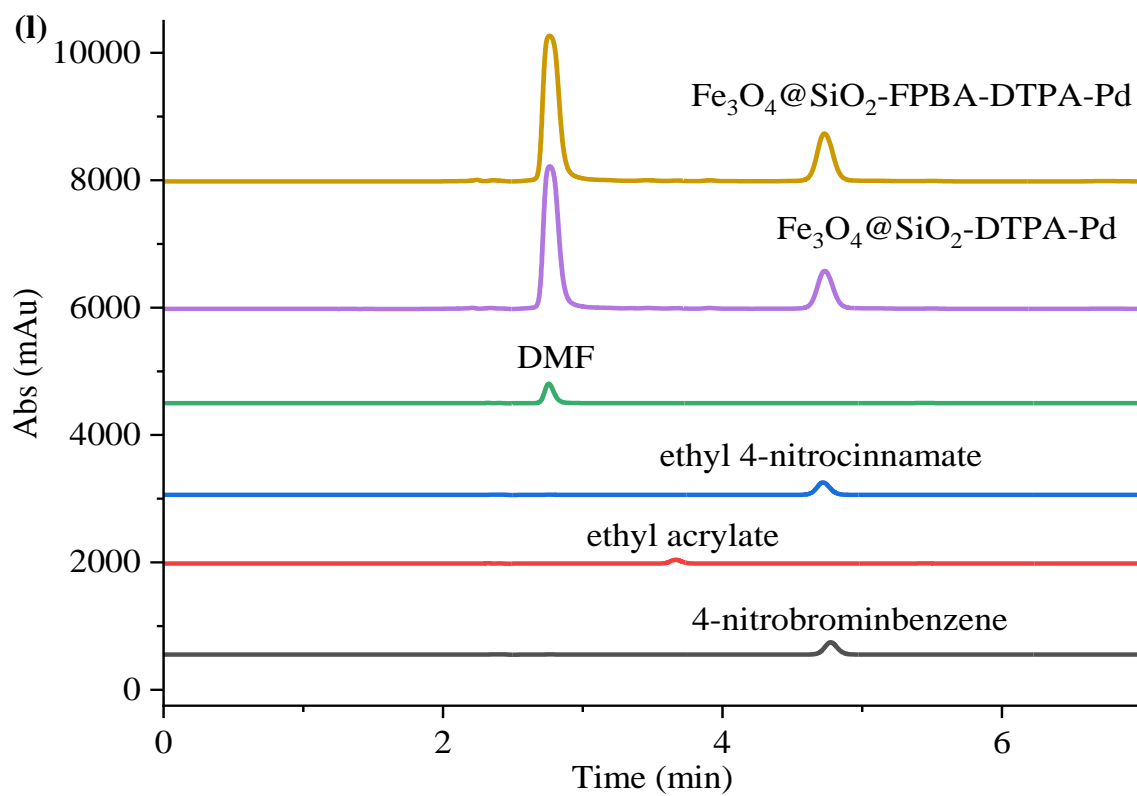

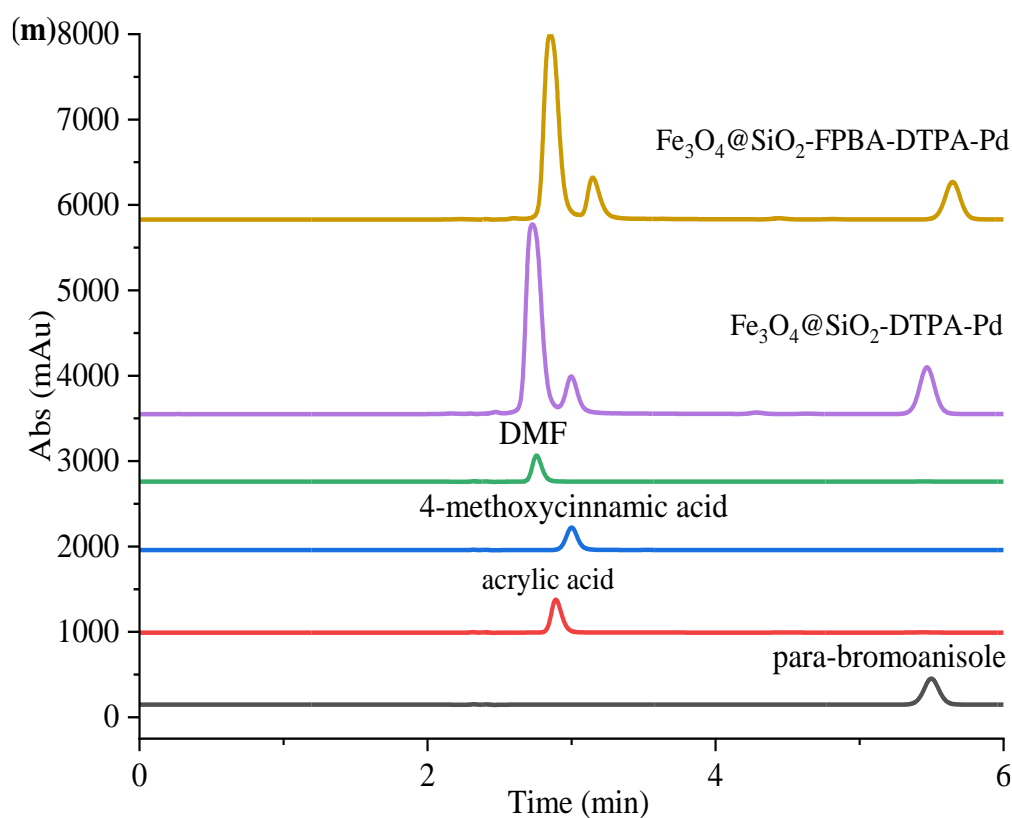

Figure S3 HPLC chromatograms of Heck reaction products between p-methyl iodobenzene and methyl acrylate (a), iodobenzene and ethyl acrylate (b), p-nitroiodobenzene and ethyl acrylate (c), p-methyl iodobenzene and ethyl acrylate (d), 2-methoxyiodobenzene and acrylic acid (e), 3-methoxyiodobenzene and acrylic acid (f), 4-methoxyiodobenzene and acrylic acid (g), iodobenzene and acrylic acid (h), and iodobenzene and methyl acrylate (i), 2-iodobiphenyl and acrylic acid (j), iodonaphthalene and acrylic acid (k), 4-nitrobrominbenzene and ethyl acrylate (l), para-bromoanisole and acrylic acid (m)

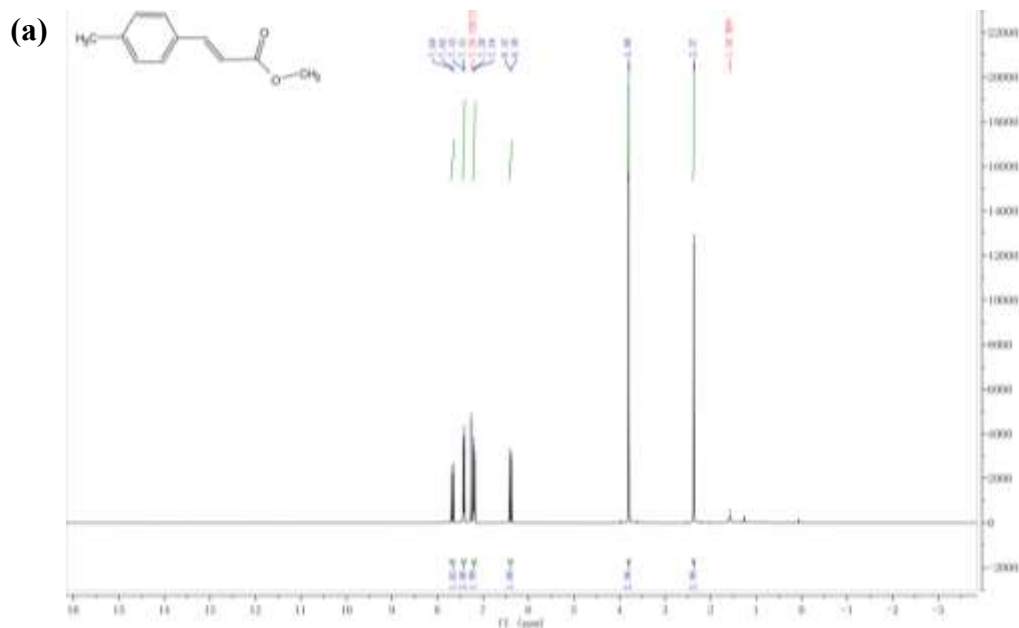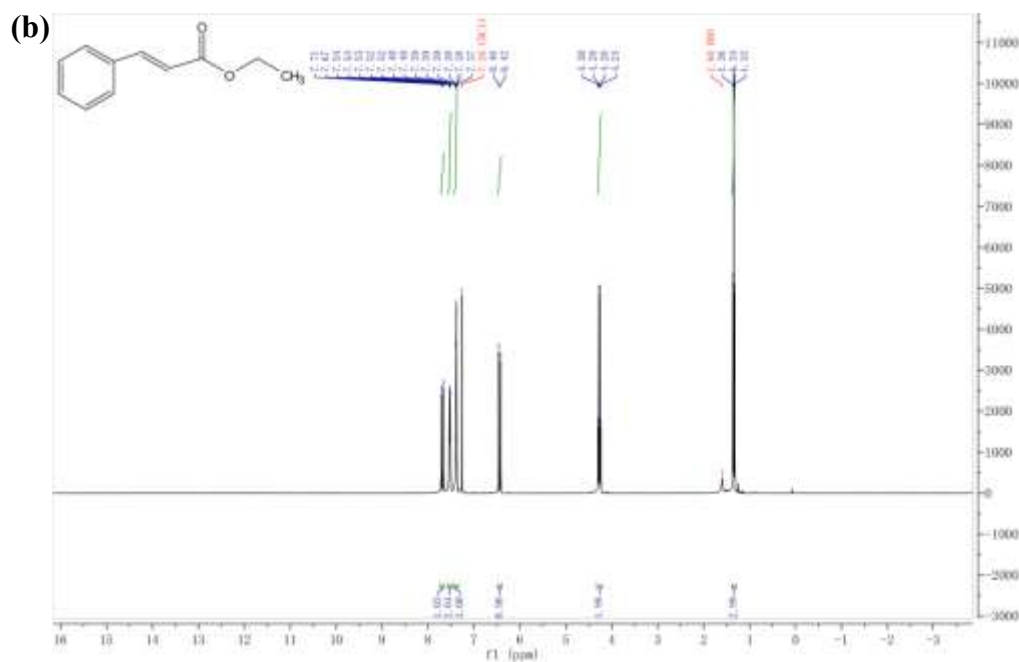

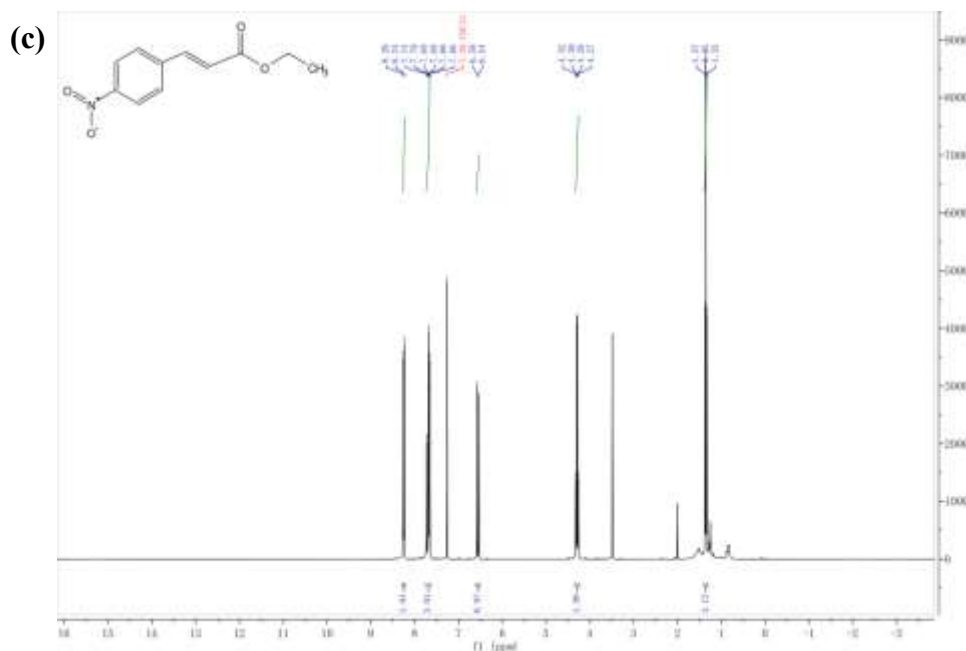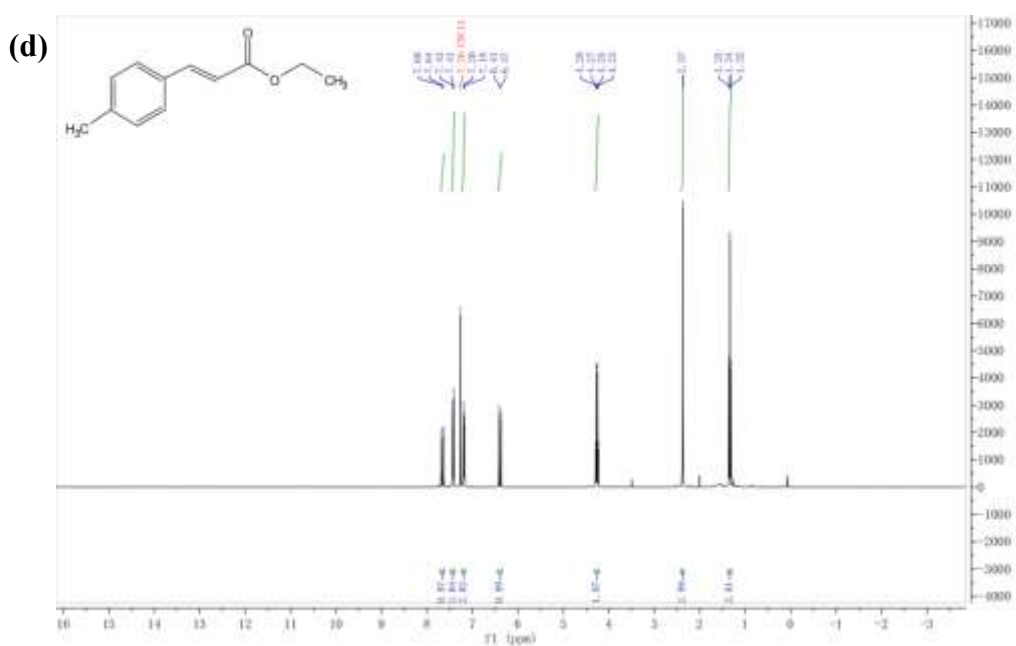

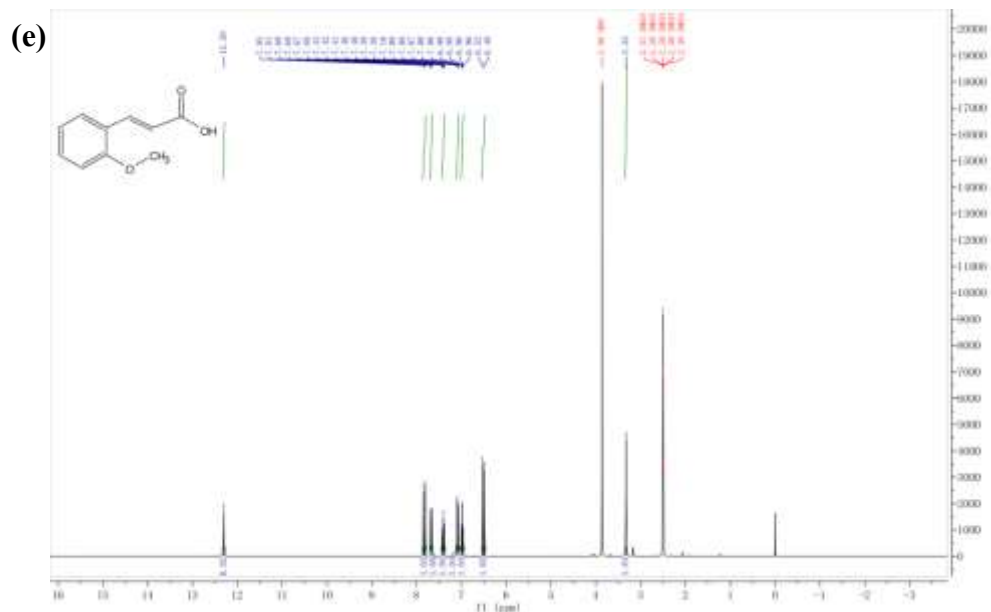

$^1\text{H NMR}$  (400 MHz,  $\text{DMSO-}d_6$ ) :  $\delta$  12.30 (s, 1H), 7.83 (d,  $J = 16.2$  Hz, 1H), 7.67 (dd,  $J = 7.7, 1.7$  Hz, 1H), 7.40 (ddd,  $J = 8.8, 7.4, 1.7$  Hz, 1H), 7.08 (dd,  $J = 8.4, 1.0$  Hz, 1H), 6.98 (td,  $J = 7.5, 1.0$  Hz, 1H), 6.50 (d,  $J = 16.1$  Hz, 1H), 3.33 (s, 3H)

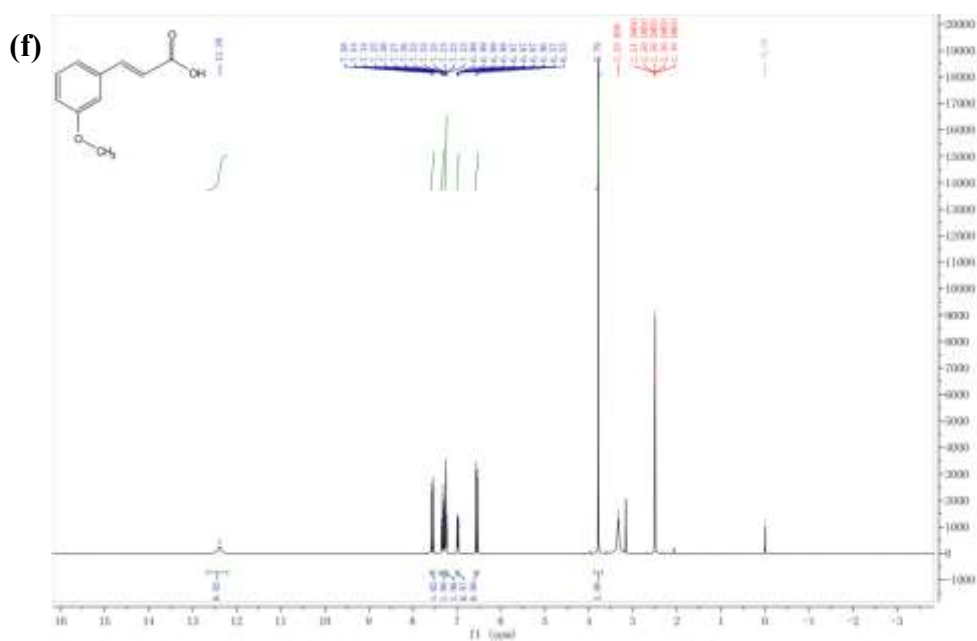

$^1\text{H NMR}$  (400 MHz,  $\text{DMSO-}d_6$ ) :  $\delta$  12.39 (s, 1H), 7.56 (d,  $J = 16.0$  Hz, 1H), 7.32 (t,  $J = 7.8$  Hz, 1H), 7.28 – 7.21 (m, 2H), 6.98 (ddd,  $J = 8.1, 2.5, 1.0$  Hz, 1H), 6.55 (d,  $J = 16.0$  Hz, 1H), 3.79 (s, 3H)



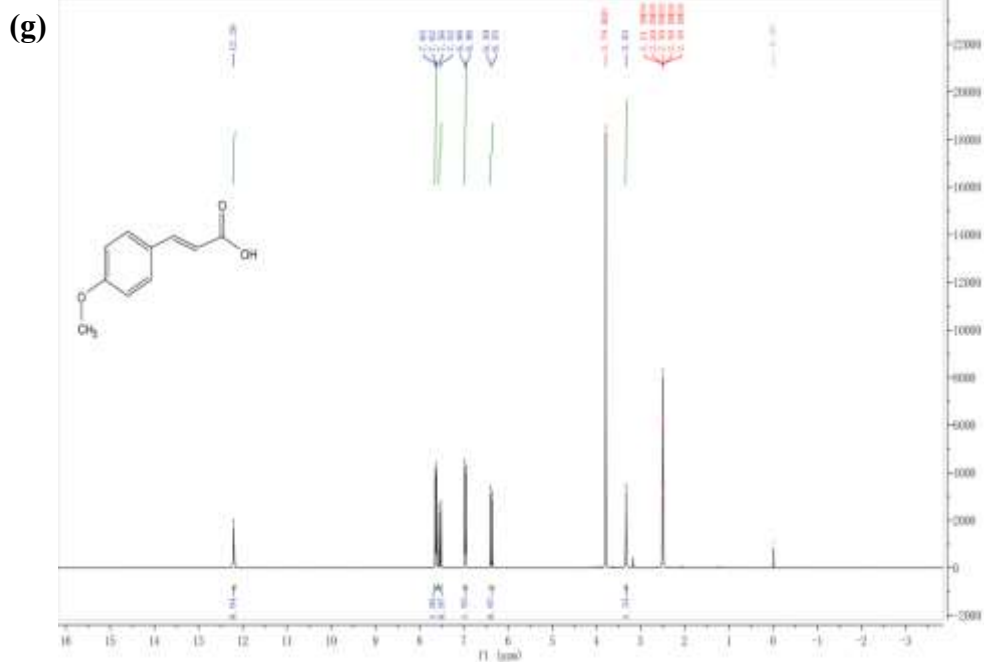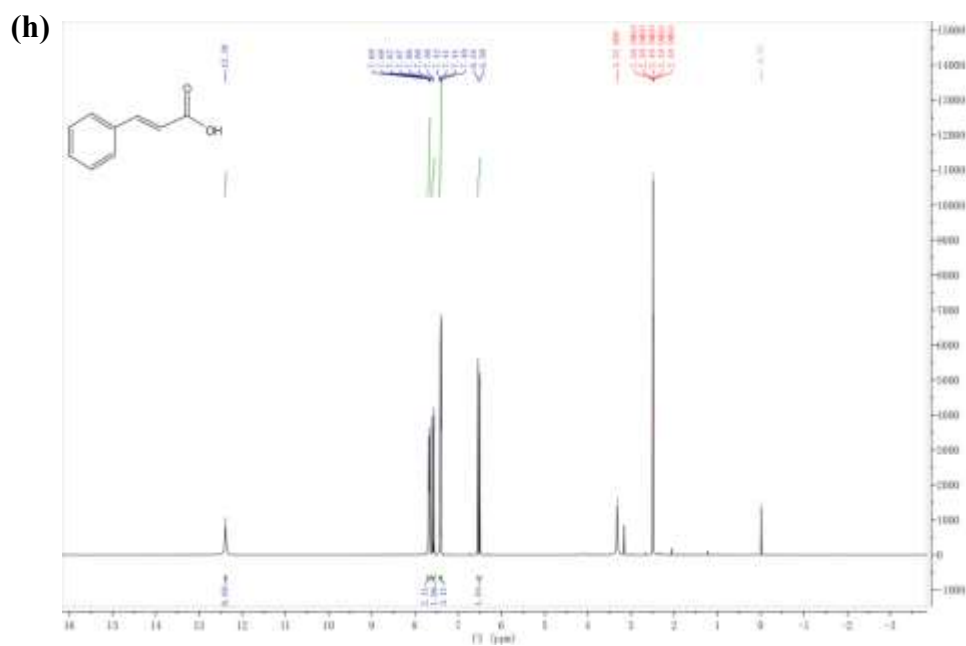

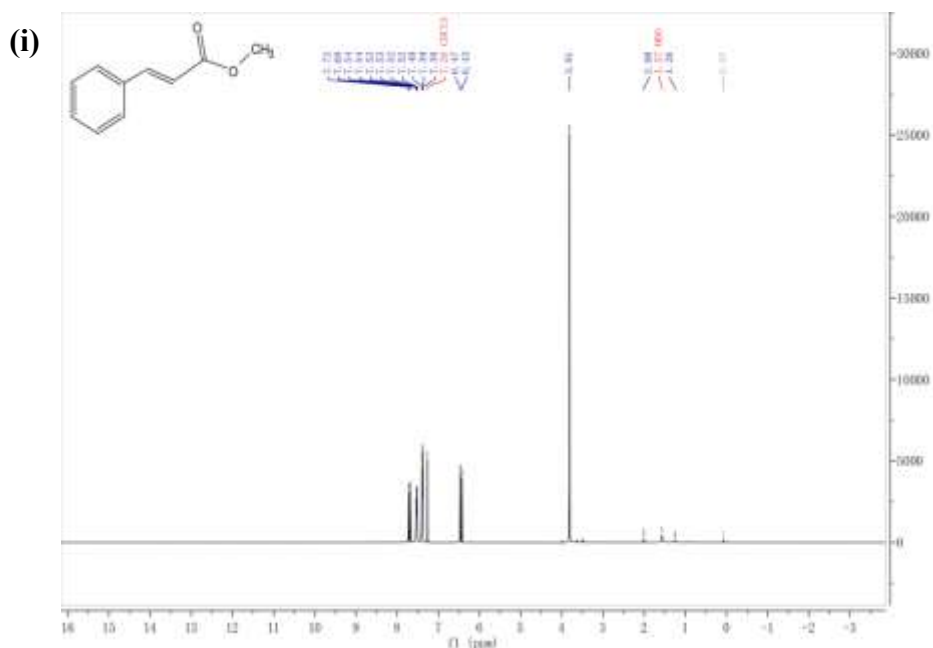

$^1\text{H}$  NMR (400 MHz, Chloroform-*d*) :  $\delta$  7.70 (d,  $J = 16.0$  Hz, 1H), 7.57 – 7.49 (m, 2H), 7.42 – 7.36 (m, 3H), 6.45 (d,  $J = 16.0$  Hz, 1H), 3.81 (s, 3H)

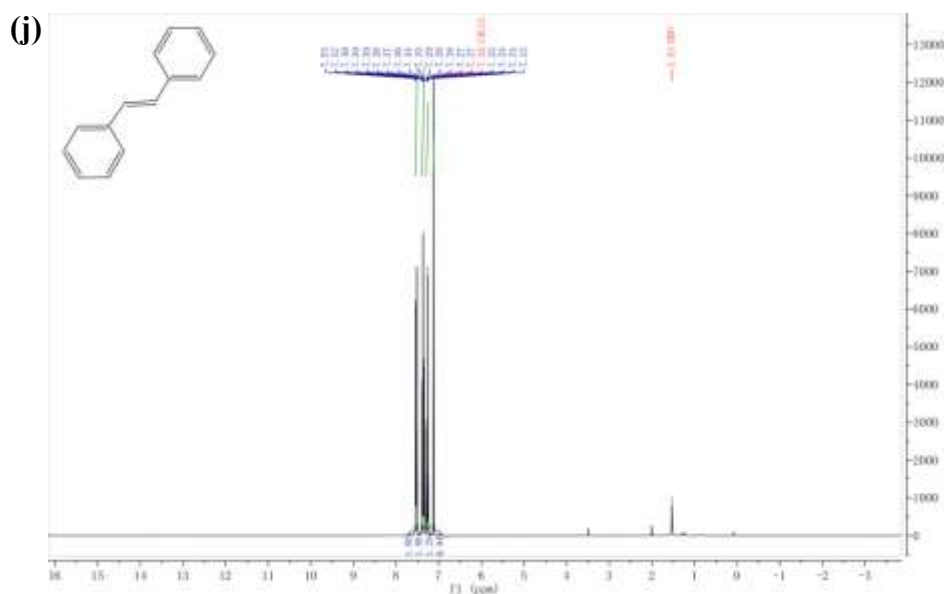

$^1\text{H}$  NMR (400 MHz, Chloroform-*d*) :  $\delta$  7.52 (d,  $J = 7.4$  Hz, 2H), 7.41 – 7.32 (m, 2H), 7.31 – 7.22 (m, 1H), 7.12 (s, 1H)

Figure S4  $^1\text{H}$  NMR spectra of Heck product of Methyl *p*-methylcinnamic acid (a), ethyl cinnamic acid (b), ethyl *p*-nitrocinnamic acid (c), ethyl *p*-methylcinnamic acid (d), 2-methoxycinnamic acid (e), 3-methoxycinnamic acid (f), 4-methoxycinnamic acid (g), cinnamic acid (h), methyl cinnamic acid (i) and trans -1, 2-stilbenes (j)

Table S1 Conditions optimization of the Heck reaction model of iodobenzene with methyl acrylate catalyzed by two catalysts

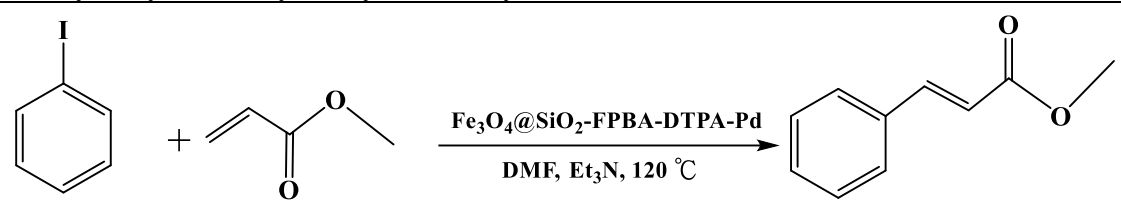

| Entry | Time<br>(min) | Catalyst<br>(mol%) | Yeild(%)                                                 |                                                     |
|-------|---------------|--------------------|----------------------------------------------------------|-----------------------------------------------------|
|       |               |                    | $\text{Fe}_3\text{O}_4@\text{SiO}_2\text{-FPBA-DTPA-Pd}$ | $\text{Fe}_3\text{O}_4@\text{SiO}_2\text{-DTPA-Pd}$ |
| 1     | 15            | 1.00               | 70                                                       | 73                                                  |
| 2     | 30            | 1.00               | 81                                                       | 82                                                  |
| 3     | 45            | 1.00               | 84                                                       | 77                                                  |
| 4     | 60            | 1.00               | 91                                                       | 85                                                  |
| 5     | 90            | 1.00               | 96                                                       | 91                                                  |
| 6     | 120           | 1.00               | 98                                                       | 88                                                  |
| 7     | 120           | 0.34               | 88                                                       | 69                                                  |
| 8     | 120           | 0.50               | 97                                                       | 90                                                  |
| 9     | 120           | 0.80               | 97                                                       | 85                                                  |

Conditions: 0.5 mmol iodobenzene, 0.75 mmol styrene, 1.0 mmol triethylamine as base, and 3 mL DMF as solvent,  $120\text{ }^\circ\text{C}$
